# Supplementary material for: Correlations between MRI and Information Processing Speed in MS: A Meta-Analysis
Source: Hindawi journal article supplement (doi:10.1155/2014/975803), 2014-01-01
Supplement: f1 [file 975803.f1.pdf]

**TITLE:** Correlations between MRI and Information Processing Speed in MS: A Meta-Analysis

**JOURNAL:** Multiple Sclerosis Journal

**AUTHORS:** S.M. Rao, PhD<sup>1</sup>; A. Martin, BS<sup>2</sup>; R. Huelin, BA<sup>2</sup>; E. Wissinger, PhD<sup>2</sup>; Z. Khankhel, BS<sup>2</sup>; E. Kim, MD<sup>3</sup>; K. Fahrbach, PhD<sup>2</sup>

**CORRESPONDING AUTHOR:** Amber Martin, Evidera, [amber.martin@evidera.com](mailto:amber.martin@evidera.com)

**Table 1: Supplementary Table 1 MS Studies Evaluating Correlations between T2LV and SDMT and/or T2LV and PASAT**

| Reference          | Disease Course                  | Cognitive Test | Sample Size | r-value | p-value | Mean (SD) Score | Cognitively Impaired |
|--------------------|---------------------------------|----------------|-------------|---------|---------|-----------------|----------------------|
| Amato 2008         | Benign MS                       | SDMT           | 47          | NS      |         | NR              | 23.4%                |
| Achiron 2003       | Probable MS                     | SDMT           | 67          | NR      | NR      | NR              | NR                   |
| Brass 2006         | Mixed                           | SDMT           | 33          | NS      |         | NR              | NR                   |
| Benedict 2007      | Mixed                           | SDMT           | 60          | -0.45   | <0.01   | NR              | 61.7%                |
| Benedict 2009      | Mixed                           | SDMT           | 50          | -0.55   | <0.001  | NR              | NR                   |
| Christodoulou 2003 | Mixed                           | SDMT           | 37          | -0.637  | 0.01    | 47.0 (14.1)     | 100%*                |
| Hohol 1997         | Mixed: CPMS, SPMS, and PPMS     | SDMT           | 13          | -0.89   | <0.001  | NR              | NR                   |
|                    | Mixed: RRMS, CPMS, SPI and PPMS | SDMT           | 44          | -0.66   | <0.001  | 41.5 (11.6)     | NR                   |
| Houtchens 2007     | Mixed                           | SDMT           | 31          | -0.524  | <0.001  | 48.2 (19)       | NR                   |
| Lazeron 2000       | Mixed                           | SDMT           | 39          | NS      |         | 44.9 (14.4)     | 21%                  |
| Lazeron 2005       | Mixed                           | SDMT           | 82          | -0.503  | <0.001  | 45.22 (13.67)   | 67%                  |
| Sanfilippo 2006    | Mixed                           | SDMT           | 33          | -0.47   | NR      | 45.0 (10.7)     | NR                   |
| Amato 2010         | RRMS                            | SDMT           | 49          | NS      |         | 48.7 (13.3)     | 30.6%                |
| Bonnet 2006        | RRMS, Low education group       | SDMT           | 19          | <0.30   | NR      | 36.31 (8.49)    | NR                   |
|                    | RRMS, High education group      | SDMT           | 24          | >0.40   | <0.05   | 46.33 (11.46)   | NR                   |

| Reference      | Disease Course                  | Cognitive Test | Sample Size | r-value | p-value | Mean (SD)<br>Score | Cognitively<br>Impaired |
|----------------|---------------------------------|----------------|-------------|---------|---------|--------------------|-------------------------|
| Brochet 2008   | RRMS                            | SDMT           | 46          | -0.31   | 0.032   | NR                 | NR                      |
| Deloire 2005   | RRMS                            | SDMT           | 58          | -0.51   | <0.0001 | 41.19 (12.49)      | 45%                     |
| Patti 2009     | RRMS                            | SDMT           | 327         | -0.219  | <0.001  | NR                 | 22%                     |
| Portaccio 2006 | RRMS                            | SDMT           | 41          | NS      |         | NR                 | 56%                     |
| Rovaris 2002   | RRMS                            | SDMT           | 34          | -0.49   | 0.003   | NR                 | 26.5%                   |
| Achiron 2003   | Probable MS                     | PASAT-3        | 67          | NS      |         | NR                 | NR                      |
| Amato 2008     | Benign MS                       | PASAT          | 47          | NR      | NR      | NR                 | 23.4%                   |
| Mesaros 2009   | Benign MS                       | PASAT-3        | 54          | -0.32   | 0.03    | NR                 | 17%                     |
| Amato 2010     | RRMS                            | PASAT-2        | 49          | NS      |         | 28.3 (9.9)         | 30.6%                   |
|                |                                 | PASAT-3        | 49          | NS      |         | 39.7 (12.4)        | 30.6%                   |
| Bonnet 2006    | RRMS - Low<br>educational level | PASAT-2        | 19          | <0.30   | NR      | 25.1 (16.26)       | NR                      |
|                |                                 | PASAT-3        | 19          | <0.30   | NR      | 36.31 (16.46)      | NR                      |
|                |                                 | PASAT-2        | 24          | <0.30   | NR      | 37.62 (8.98)       | NR                      |
|                |                                 | PASAT-3        | 24          | >0.40   | <0.05   | 47.41 (8.63)       | NR                      |
| Brochet 2008   | RRMS                            | PASAT          | 46          | NS      |         | NR                 | NR                      |
| Deloire 2005   | RRMS                            | PASAT-2        | 58          | NR      | NR      | 32.70 (13.35)      | 45%                     |
|                |                                 | PASAT-3        | 58          | -0.34   | <0.05   | 42.43 (13.57)      | 45%                     |
| Lanzillo 2006  | RRMS                            | PASAT          | 52          | NR      | <0.01   | NR                 | 46%                     |
| Lin 2008       | RRMS                            | PASAT-3        | 36          | -0.4    | 0.017   | NR                 | 25%                     |

| Reference             | Disease Course      | Cognitive Test            | Sample Size | r-value | p-value | Mean (SD)<br>Score | Cognitively<br>Impaired |
|-----------------------|---------------------|---------------------------|-------------|---------|---------|--------------------|-------------------------|
| Locatelli 2004        | RRMS                | PASAT                     | 39          | NR      | NR      | 44.9 (14.9)        | NR                      |
| Mineev 2009           | RRMS                | PASAT-3                   | 65          | NR      | NR      | NR                 | NR                      |
| Patti 2009            | RRMS                | PASAT-3                   | 327         | -0.113  | 0.057   |                    | 22%                     |
|                       |                     | PASAT-2                   | 327         | -0.103  | 0.083   |                    | 22%                     |
| Portaccio 2006        | RRMS                | PASAT-2                   | 41          | NS      |         | NR                 | 56%                     |
|                       |                     | PASAT-3                   | 41          | NS      |         | NR                 | 56%                     |
| Portaccio 2009        | RRMS                | PASAT-2                   | 50          | NR      | NR      | NR                 | 33%                     |
|                       |                     | PASAT-3                   | 50          | NR      | NR      | NR                 | 33%                     |
| Rovaris 2002          | RRMS                | PASAT                     | 34          | <0.30   | NR      | NR                 | 26.5%                   |
| Edwards 2001          | Mixed               | PASAT                     | 40          | 0.51    | 0.001   | NR                 | NR                      |
| Hohol 1997            | SPMS + PPMS         | PASAT-3                   | 13          | -0.26   | 0.47    | NR                 | NR                      |
|                       | Mixed               | PASAT-3                   | 44          | -0.58   | <0.001  | 69.7 (21.3)        | NR                      |
| Houtchens 2007        | Mixed               | mean of PASAT-2<br>and -3 | 31          | -0.501  | 0.002   | 35.1 (14)          | NR                      |
| Benedict 2007         | Mixed               | PASAT                     | 60          | -0.23   | >0.05   | NR                 | 61.7%                   |
| Brass 2006            | Mixed               | PASAT                     | 33          | NS      |         | NR                 | NR                      |
| Christodoulou<br>2003 | Mixed               | PASAT-3                   | 37          | -0.504  | =0.01   | 39.3 (13.6)        | 100%^                   |
|                       |                     | PASAT-2                   | 37          | -0.309  | =0.1    | 29.1 (10.1)        | 100%^                   |
| Cicarelli 2002        | Mixed (conventional | PASAT-3                   | 39          | -0.29   | >0.05   | 46 (14-60)*        | NR                      |

| Reference    | Disease Course           | Cognitive Test         | Sample Size | r-value | p-value | Mean (SD) Score | Cognitively Impaired |
|--------------|--------------------------|------------------------|-------------|---------|---------|-----------------|----------------------|
|              | T2LV)                    |                        |             |         |         |                 |                      |
|              | Mixed (T2LV using FLAIR) | PASAT-3                | 39          | -0.26   | >0.05   | 46 (14-60)*     | NR                   |
| Kalkers 2001 | PPMS                     | PASAT-3                | 29          | NS      |         | 45 (22-52)      | NR                   |
|              | SPMS                     | PASAT-3                | 41          | -0.44   | =0.01   | 37 (30-49)*     | NR                   |
|              | RRMS                     | PASAT-3                | 64          | -0.28   | =0.05   | 48 (39-55)*     | NR                   |
|              | SPMS + PPMS              | PASAT-3                | 70          | -0.36   | >0.05   | NR              | NR                   |
|              | Mixed                    | PASAT-3                | 134         | -0.27   | =0.01   | 46 (32-52)*     | NR                   |
| Lazeron 2000 | Mixed                    | mean of PASAT-2 and -3 | 39          | NS      |         | 72.3 (27.2)     | 21%                  |
| Lazeron 2005 | Mixed                    | PASAT-3                | 82          | -0.405  | <0.001  | 39.7 (18.93)    | 67%                  |
|              |                          | PASAT-2                | 82          | -0.374  | <0.001  | 29.44 (15.36)   | 67%                  |
| Rao 1989     | Mixed                    | PASAT-2                | 53          | NS      |         | NR              | 36%                  |
|              |                          | PASAT-3                | 53          | NS      |         | NR              | 36%                  |
| Snyder 2001  | Mixed                    | PASAT - dyad           | -0.40       | 0.01    | 41      | 10.15 (9.46)    | NR                   |

\* Median (range)

^ Mild cognitive impairment

CPMS = Chronic progressive multiple sclerosis; MS = Multiple sclerosis; NR = Not reported; NS = Non-significant; PASAT = Paced auditory serial addition test; PPMS = Primary progressive multiple sclerosis; RRMS = Relapse-remitting multiple sclerosis; SD = Standard deviation; SPMS = Secondary progressive multiple sclerosis; T2LV = T2-weighted lesion volume

**Table 2: Supplementary Table 2 MS Studies Evaluating Correlations between Brain Atrophy and SDMT and/or Atrophy and PASAT**

| Reference          | Disease Course         | Cognitive Test | MRI Measure       | Sample Size | r-value | p-value | Mean (SD) Score | Cognitively Impaired |
|--------------------|------------------------|----------------|-------------------|-------------|---------|---------|-----------------|----------------------|
| Amato 2008         | Benign MS              | SDMT           | Atrophy (NBV)     | 47          | NR      | NR      | NR              | 23.4%                |
| Benedict 2005      | Mixed                  | SDMT           | Atrophy (Mixed)   | 31          | 0.63    | <0.001  | NR              | NR                   |
| Benedict 2006      | Mixed                  | SDMT           | Atrophy (TVW)     | 82          | -0.62   | <0.001  | NR              | 59.8%                |
|                    | RRMS                   | SDMT           | Atrophy (TVW)     | NR          | -0.44   | <0.005  | NR              | NR                   |
|                    | SPMS                   | SDMT           | Atrophy (TVW)     | NR          | -0.62   | <0.005  | NR              | NR                   |
| Benedict 2007      | Mixed                  | SDMT           | Atrophy (BPF)     | 60          | 0.61    | <0.01   | NR              | 61.7%                |
| Benedict 2009      | Mixed                  | SDMT           | Atrophy (NBV)     | 50          | 0.4     | <0.01   | NR              | NR                   |
| Brass 2006         | Mixed                  | SDMT           | (BPF)             | 33          | 0.57    | NR      | NR              | NR                   |
| Christodoulou 2003 | Mixed                  | SDMT           | Atrophy (Central) | 37          | -0.7    | 0.01    | 47.0 (14.1)     | 100%*                |
| Hohol 1997         | Mixed: CPMS, SPMS, and | SDMT           | Atrophy (BICVR)   | 13          | 0.73    | 0.02    | NR              | NR                   |

| Reference       | Disease Course                | Cognitive Test | MRI Measure     | Sample Size | r-value | p-value | Mean (SD) Score | Cognitively Impaired |
|-----------------|-------------------------------|----------------|-----------------|-------------|---------|---------|-----------------|----------------------|
|                 | PPMS                          |                |                 |             |         |         |                 |                      |
|                 | Mixed: RRMS, CPMS, SPMS, PPMS | SDMT           | Atrophy (BICVR) | 44          | 0.63    | <0.001  | 41.5 (11.6)     | NR                   |
| Houtchens 2007  | Mixed                         | SDMT           | Atrophy (TVW)   | 31          | -0.44   | 0.007   | 48.2 (19)       | NR                   |
|                 |                               | SDMT           | Atrophy (BPF)   | 31          | 0.57    | <0.001  | 48.2 (19)       | NR                   |
| Lazeron 2005    | Mixed                         | SDMT           | Atrophy (RBV)   | 82          | 0.54    | <0.001  | 45.22 (13.67)   | 67%                  |
| van Buchem 1998 | Mixed                         | SDMT           | Atrophy (BV)    | 33          | 0.24    | 0.14    | NR              | 54%                  |
| Cortese 2011    | NR                            | SDMT           | Atrophy (SBV)   | 51          | 0.39    | 0.006   | NR              | NR                   |
| Amato 2010      | RRMS                          | SDMT           | Atrophy (PBVC)  | 41          | NS      |         | NR              | 43.9%                |

| Reference      | Disease Course             | Cognitive Test | MRI Measure   | Sample Size | r-value | p-value | Mean (SD) Score | Cognitively Impaired |
|----------------|----------------------------|----------------|---------------|-------------|---------|---------|-----------------|----------------------|
| Bonnet 2006    | RRMS, Low education group  | SDMT           | Atrophy (VF)  | 19          | <0.30   | NR      | 36.31 (8.49)    | NR                   |
|                | RRMS, Low education group  | SDMT           | Atrophy (BPF) | 19          | <0.30   | NR      | 36.31 (8.49)    | NR                   |
|                | RRMS, High education group | SDMT           | Atrophy (VF)  | 24          | <0.30   | NR      | 46.33 (11.46)   | NR                   |
|                | RRMS, High education group | SDMT           | Atrophy (BPF) | 24          | >0.40   | <0.05   | 46.33 (11.46)   | NR                   |
| Brochet 2008   | RRMS                       | SDMT           | Atrophy (BPF) | 46          | NS      |         | NR              | NR                   |
|                |                            | SDMT           | Atrophy (VF)  | 46          | NS      |         | NR              | NR                   |
| Deloire 2005   | RRMS                       | SDMT           | Atrophy (BPF) | 58          | NR      | NR      | 41.19 (12.49)   | 45%                  |
|                |                            | SDMT           | Atrophy (VF)  | 58          | NR      | NR      | 41.19 (12.49)   | 45%                  |
| Portaccio 2006 | RRMS                       | SDMT           | Atrophy (NBV) | 41          | NS      |         | NR              | 56%                  |
| Portaccio 2009 | RRMS                       | SDMT           | Atrophy (NBV) | 50          | NR      | NR      | NR              | 33%                  |



| Reference    | Disease Course         | Cognitive Test | MRI Measure                                           | Sample Size | r-value | p-value | Mean (SD) Score | Cognitively Impaired |
|--------------|------------------------|----------------|-------------------------------------------------------|-------------|---------|---------|-----------------|----------------------|
| Amato 2008   | Benign MS              | PASAT          | Atrophy (NBV)                                         | 47          | NR      | NR      | NR              | 23.4%                |
| Hohol 1997   | Chronic Progressive MS | PASAT-3        | Atrophy (BICVR)                                       | 13          | 0.67    | 0.03    | NR              | NR                   |
|              | Mixed                  | PASAT-3        | Atrophy (BICVR)                                       | 44          | 0.56    | <0.001  | 69.7 (21.3)     | NR                   |
| Lazeron 2005 | Mixed                  | PASAT-3        | Atrophy (RBV)                                         | 82          | 0.34    | <0.01   | 39.7 (18.93)    | 67%                  |
|              |                        | PASAT-2        | Atrophy (RBV)                                         | 82          | 0.36    | <0.01   | 29.44 (15.36)   | 67%                  |
| Rao 1989     | Mixed                  | PASAT-3        | Atrophy (VBR)                                         | 53          | NS      |         | NR              | 36%                  |
|              |                        | PASAT-2        | Atrophy (VBR)                                         | 53          | NS      |         | NR              | 36%                  |
| Edwards 2001 | Mixed                  | PASAT          | Atrophy (normalized total cerebral hemisphere volume) | 40          | NR      |         | NR              | NR                   |

| Reference          | Disease Course | Cognitive Test | MRI Measure                           | Sample Size | r-value | p-value | Mean (SD) Score | Cognitively Impaired |
|--------------------|----------------|----------------|---------------------------------------|-------------|---------|---------|-----------------|----------------------|
|                    |                | PASAT          | Atrophy (VV)                          | 40          | NR      |         | NR              | NR                   |
| van Buchem 1998    | Mixed          | PASAT          | Atrophy (BV)                          | 33          | 0.47    | 0.002   | NR              | 54%                  |
| Christodoulou 2003 | Mixed          | PASAT-3        | Atrophy (central)                     | 37          | -0.462  | =0.01   | 29.1 (10.1)     | 100%*                |
|                    |                | PASAT-2        | Atrophy (central)                     | 37          | -0.456  | =0.01   | 39.3 (13.6)     | 100%*                |
| Benedict 2007      | Mixed          | PASAT          | Atrophy (BPF)                         | 60          | 0.24    | >0.05   | NR              | 61.7%                |
| Sumowski 2009      | Mixed          | PASAT + SDMT   | Atrophy (TVW) low cognitive function  | NR          | -0.79   | <0.001  | NR              | NR                   |
|                    |                | PASAT + SDMT   | Atrophy (TVW) All patients            | 38          | -0.46   | <0.01   | NR              | NR                   |
|                    |                | PASAT + SDMT   | Atrophy (TVW) high cognitive function | NR          | -0.16   | >0.5    | NR              | NR                   |

| Reference      | Disease Course      | Cognitive Test         | MRI Measure                           | Sample Size | r-value | p-value | Mean (SD) Score | Cognitively Impaired |
|----------------|---------------------|------------------------|---------------------------------------|-------------|---------|---------|-----------------|----------------------|
| Brass 2006     | Mixed               | PASAT                  | Atrophy (BPF)                         | 33          | NS      |         | NR              | NR                   |
| Houtchens 2007 | Mixed               | mean of PASAT-2 and -3 | Atrophy (TVW)                         | 31          | -0.590  | <0.0001 | 35.1 (14)       | NR                   |
|                |                     | mean of PASAT-2 and -3 | Atrophy (BPF)                         | 31          | 0.585   | <0.0001 | 35.1 (14)       | NR                   |
| Benedict 2005  | Mixed               | PASAT                  | Atrophy (LVV) – age covariate         | 31          | 0.42    | 0.3     |                 | NR                   |
|                |                     | PASAT                  | Atrophy (LVV) – age and BDI covariate | 31          | 0.47    | 0.2     |                 | NR                   |
| Cortese 2011   | Mixed               | PASAT-3                | Atrophy (SBV)                         | 51          | NS      |         | NR              | NR                   |
| Amato 2010     | RRMS                | mean of PASAT-2 and -3 | Atrophy (PBVC)                        | 41          | NS      |         |                 | 43.9%                |
| Bonnet 2006    | RRMS, low education | PASAT-2                | Atrophy (BPF)                         | 19          | <0.30   | NR      | 25.1 (16.26)    | NR                   |

| Reference    | Disease Course             | Cognitive Test | MRI Measure   | Sample Size | r-value | p-value | Mean (SD) Score | Cognitively Impaired |
|--------------|----------------------------|----------------|---------------|-------------|---------|---------|-----------------|----------------------|
|              | group                      | PASAT-2        | Atrophy (VF)  | 19          | <0.30   | NR      | 25.1 (16.26)    | NR                   |
|              | RRMS, high education group | PASAT-2        | Atrophy (BPF) | 24          | <0.30   | NR      | 37.62 (8.98)    | NR                   |
|              | group                      | PASAT-2        | Atrophy (VF)  | 24          | <0.30   | NR      | 37.62 (8.98)    | NR                   |
|              | RRMS, low education group  | PASAT-3        | Atrophy (BPF) | 19          | <0.30   | NR      | 36.31 (16.46)   | NR                   |
|              | group                      | PASAT-3        | Atrophy (VF)  | 19          | <0.30   | NR      | 36.31 (16.46)   | NR                   |
|              | RRMS, high education group | PASAT-3        | Atrophy (VF)  | 24          | <0.30   | NR      | 47.41 (8.63)    | NR                   |
|              | group                      | PASAT-3        | Atrophy (BPF) | 24          | >0.40   | <0.05   | 47.41 (8.63)    | NR                   |
| Brochet 2008 | RRMS                       | PASAT          | Atrophy (BPF) | 46          | NS      |         |                 | NR                   |
|              |                            | PASAT          | Atrophy (VF)  | 46          | NS      |         |                 | NR                   |
| Deloire 2005 | RRMS                       | PASAT-2        | Atrophy (BPF) | 58          | NR      | NR      | 32.70 (13.35)   | 45%                  |
|              |                            | PASAT-2        | Atrophy (VF)  | 58          | NR      | NR      | 32.70 (13.35)   | 45%                  |

| Reference        | Disease Course | Cognitive Test | MRI Measure                             | Sample Size | r-value | p-value | Mean (SD) Score | Cognitively Impaired |
|------------------|----------------|----------------|-----------------------------------------|-------------|---------|---------|-----------------|----------------------|
|                  |                | PASAT-3        | Atrophy (BPF)                           | 58          | NR      | NR      | 42.43 (13.57)   | 45%                  |
|                  |                | PASAT-3        | Atrophy (VF)                            | 58          | NR      | NR      | 42.43 (13.57)   | 45%                  |
| Hildebrandt 2006 | RRMS           | PASAT-3        | Atrophy (VF)                            | 45          | NR      | 0.8564  | NR              | NR                   |
|                  |                | PASAT-3        | Atrophy (BPF)                           | 45          | NR      | 0.9423  | NR              | NR                   |
| Khalil 2011      | RRMS           | PASAT-3+SDMT   | Atrophy (normalized ventricular volume) | 80          | -0.3    | <0.01   | NR              | 16.3%                |
|                  |                | PASAT-3+SDMT   | Atrophy (NBV)                           | 80          | 0.4     | <0.001  | NR              | 13.6%                |
| Locatelli 2004   | RRMS           | PASAT          | Atrophy (BPF)                           | 39          | 0.3     | 0.045   | 44.9 (14.9)     | NR                   |
| Portaccio 2006   | RRMS           | PASAT-2        | Atrophy (NBV)                           | 41          | NS      |         | NR              | 56%                  |
|                  |                | PASAT-3        | Atrophy (NBV)                           | 41          | NS      |         | NR              | 56%                  |

| Reference      | Disease Course | Cognitive Test | MRI Measure         | Sample Size | r-value | p-value | Mean (SD) Score | Cognitively Impaired |
|----------------|----------------|----------------|---------------------|-------------|---------|---------|-----------------|----------------------|
| Portaccio 2009 | RRMS           | PASAT-2        | Atrophy (NBV)       | 50          | NR      |         | NR              | 33%                  |
|                |                | PASAT-3        | Atrophy (NBV)       | 50          | NR      |         | NR              | 33%                  |
| Mineev 2009    | RRMS           | PASAT-3        | Atrophy (CPV index) | 65          | 0.4     | <0.05   | NR              | NR                   |
| Benedict 2006  | SPMS           | PASAT          | Atrophy (TVW)       | NR          | -0.45   | <0.05   | NR              | NR                   |

\* Mild cognitive impairment

BDI = Beck Depression Inventory; BICVR = Brain to intracranial volume ratio; BPF = Brain parenchymal fraction; BV = Brain volume; CPMS = Chronic progressive multiple sclerosis; CPV = Cerebral perfusion volume; LVV = Lateral ventricle volume; MS = Multiple sclerosis; NBV = Normalized brain volume; NR = Not reported; NS = Non-significant; PASAT = Paced auditory serial addition test; PBVC = Percentage brain volume change; PPMS = Primary progressive multiple sclerosis; RRMS = Relapse-remitting multiple sclerosis; SD = Standard deviation; SDMT = Symbol Digit Modalities Test; SPMS = Secondary progressive multiple sclerosis; TVW = Third ventricular width; VBR = Ventricle-to-brain ratio; VF = Ventricular fraction

Table 3: [Supplementary Table 3 MS Studies Evaluating Correlations between both SDMT and PASAT with MRI Measures](#)

| Reference    | Disease Course | Cognitive Test | MRI Measure | Sample Size | r-value | p-value | Mean ± SD Score | Cognitively Impaired |
|--------------|----------------|----------------|-------------|-------------|---------|---------|-----------------|----------------------|
| Achiron 2003 | Mixed          | PASAT-3        | T2LV        | 67          | NS      |         | NR              | NR                   |
|              |                | SDMT           | T2LV        | 67          | NS      |         | NR              | NR                   |

| Reference          | Disease Course | Cognitive Test | MRI Measure | Sample Size | r-value | p-value | Mean ± SD Score | Cognitively Impaired |
|--------------------|----------------|----------------|-------------|-------------|---------|---------|-----------------|----------------------|
| Amato 2008         | Benign MS      | PASAT          | T2LV        | 47          | NR      | NR      | NR              | 23.4%                |
|                    |                | SDMT           | T2LV        | 47          | NR      | NR      | NR              | 23.4%                |
| Amato 2010         | RRMS           | PASAT-3        | T2LV        | 49          | NS      |         | 39.7 (12.4)     | 30.6%                |
|                    |                | SDMT           | T2LV        | 49          | NS      |         | 48.7 (13.3)     | 30.6%                |
| Benedict 2007      | Mixed          | PASAT          | T2LV        | 60          | -0.23   | >0.05   | NR              | 61.7%                |
|                    |                | SDMT           | T2LV        | 60          | -0.45   | <0.01   | NR              | 61.7%                |
| Bonnet 2006        | RRMS           | PASAT-3        | T2LV        | 24          | >0.40   | <0.05   | 47.41 (8.63)    | NR                   |
|                    |                | SDMT           | T2LV        | 24          | >0.40   | <0.05   | 46.33 (11.46)   | NR                   |
| Brass 2006         | Mixed          | PASAT          | T2LV        | 33          | NS      |         | NR              | NR                   |
|                    |                | SDMT           | T2LV        | 33          | NS      |         | NR              | NR                   |
| Brochet 2008       | RRMS           | PASAT          | T2LV        | 46          | NS      |         | NR              | NR                   |
|                    |                | SDMT           | T2LV        | 46          | -0.31   | 0.032   | z score         | NR                   |
| Christodoulou 2003 | Mixed          | PASAT-3        | T2LV        | 37          | -0.504  | =0.01   | 39.3 (13.6)     | 100%*                |
|                    |                | PASAT-2        | T2LV        | 37          | -0.309  | =0.1    | 29.1 (10.1)     | 100%*                |
|                    |                | SDMT           | T2LV        | 37          | -0.637  | =0.01   | 47.0 (14.1)     | 100%*                |
| Deloire 2005       | RRMS           | PASAT-3        | T2LV        | 58          | -0.34   | <0.05   | 42.43 (13.57)   | 45%                  |
|                    |                | SDMT           | T2LV        | 58          | -0.51   | <0.0001 | 41.19 (12.49)   | 45%                  |

| Reference      | Disease Course | Cognitive Test | MRI Measure | Sample Size | r-value | p-value | Mean $\pm$ SD Score | Cognitively Impaired |
|----------------|----------------|----------------|-------------|-------------|---------|---------|---------------------|----------------------|
| Hohol 1997     | CPMS           | PASAT-3        | T2LV        | 13          | -0.26   | 0.47    | NR                  | NR                   |
|                | Mixed          | PASAT-3        | T2LV        | 44          | -0.58   | <0.001  | 69.7 (21.3)         | NR                   |
|                | CPMS           | SDMT           | T2LV        | 13          | -0.89   | <0.001  | NR                  | NR                   |
|                | Mixed          | SDMT           | T2LV        | 44          | -0.66   | <0.001  | 41.5 (11.6)         | NR                   |
| Lazeron 2000   | Mixed          | PASAT          | T2LV        | 39          | NS      |         | 72.3 (27.2)         | 21%                  |
|                |                | SDMT           | T2LV        | 39          | NS      |         | 44.9 (14.4)         | 21%                  |
| Lazeron 2005   | Mixed          | PASAT-3        | T2LV        | 82          | -0.405  | <0.001  | 39.7 (18.93)        | 67%                  |
|                |                | SDMT           | T2LV        | 82          | -0.503  | <0.001  | 45.22 (13.67)       | 67%                  |
| Patti 2009     | RRMS           | PASAT-3        | T2LV        | 327         | -0.113  | 0.057   |                     | 22%                  |
|                |                | PASAT-2        | T2LV        | 327         | -0.103  | 0.083   |                     | 22%                  |
|                |                | SDMT           | T2LV        | 327         | -0.219  | <0.001  |                     | 22%                  |
| Portaccio 2006 | RRMS           | PASAT-2        | T2LV        | 41          | NS      |         | NR                  | 56%                  |
|                |                | PASAT-3        | T2LV        | 41          | NS      |         | NR                  | 56%                  |
|                |                | SDMT           | T2LV        | 41          | NS      |         | NR                  | 56%                  |
| Rovaris 2002   | RRMS           | PASAT          | T2LV        | 34          | <0.30   |         | NR                  | 26.5%                |
|                |                | SDMT           | T2LV        | 34          | -0.49   | 0.003   | NR                  | 26.5%                |
| Penny 2010     | PPMS           | PASAT-3        | T2LV        | 31          | NS      |         | 47.13 (14.34)       | 29%                  |
|                |                | SDMT           | T2LV        | 31          | -0.799  | 0.001   | NR                  | 29%                  |



| Reference     | Disease Course | Cognitive Test    | MRI Measure | Sample Size | r-value | p-value | Mean $\pm$ SD Score     | Cognitively Impaired |
|---------------|----------------|-------------------|-------------|-------------|---------|---------|-------------------------|----------------------|
| Camp 2005     | PPMS           | Change in PASAT-2 | T2LV        | 73          | NS      |         |                         | 26% at year 2        |
|               |                | Change in PASAT-3 | T2LV        | 73          | -0.303  | 0.012   | 38.28 (17.27) at year 2 | 26% at year 2        |
|               |                | Change in SDMT    | T2LV        | 73          | -0.266  | 0.017   | 40.55 (14.32) at year 2 | 26% at year 2        |
| Amato 2008    | Benign MS      | PASAT             | Atrophy     | 47          | NR      | NR      | NR                      | 23.4%                |
|               |                | SDMT              | Atrophy     | 47          | NR      | NR      | NR                      | 23.4%                |
| Benedict 2007 | Mixed          | PASAT             | Atrophy     | 60          | 0.24    | >0.05   | NR                      | 61.7%                |
|               |                | SDMT              | Atrophy     | 60          | 0.61    | <0.01   | NR                      | 61.7%                |
| Brass 2006    | Mixed          | PASAT             | Atrophy     | 33          | NS      |         | NR                      | NR                   |
|               |                | SDMT              | Atrophy     | 33          | 0.565   | NR      | NR                      | NR                   |
|               |                | PASAT-2           | Atrophy     | 37          | -0.462  | 0.01    | 29.1 (10.1)             | 100%*                |
|               |                | PASAT-3           | Atrophy     | 37          | -0.456  | 0.01    | 39.3 (13.6)             | 100%*                |
|               |                | SDMT              | Atrophy     | 37          | -0.7    | 0.01    | 47.0 (14.1)             | 100%*                |

| Reference  | Disease Course                | Cognitive Test    | MRI Measure | Sample Size | r-value | p-value | Mean ± SD Score | Cognitively Impaired |
|------------|-------------------------------|-------------------|-------------|-------------|---------|---------|-----------------|----------------------|
| Hohol 1997 | Mixed: RRMS, CPMS, SPMS, PPMS | Change in PASAT-3 | Atrophy     | 42          | 0.25    | 0.1     | NR              | NR                   |
|            | Mixed: CPMS, SPMS, and PPMS   | Change in PASAT-3 | Atrophy     | 13          | 0.54    | 0.1     | NR              | NR                   |
|            | Mixed: RRMS, CPMS, SPMS, PPMS | Change in SDMT    | Atrophy     | 44          | 0.31    | 0.05    | NR              | NR                   |
|            | Mixed: RRMS, CPMS, SPMS, PPMS | PASAT-3           | Atrophy     | 44          | 0.56    | <0.001  | 69.7 (21.3)     | NR                   |
|            | Mixed: CPMS, SPMS, and PPMS   | PASAT-3           | Atrophy     | 13          | 0.67    | 0.03    | NR              | NR                   |
|            | Mixed: RRMS, CPMS, SPMS, PPMS | SDMT              | Atrophy     | 44          | 0.63    | <0.001  | 41.5 (11.6)     | NR                   |
|            | Mixed: CPMS, SPMS, and PPMS   | SDMT              | Atrophy     | 13          | 0.73    | 0.02    | NR              | NR                   |
|            | RRMS                          | Change in PASAT-3 | Atrophy     | 13          | 0.64    | 0.07    | NR              | NR                   |
|            | RRMS                          | Change in SDMT    | Atrophy     | 14          | 0.75    | 0.01    | NR              | NR                   |
|            | RR-P MS                       | Change in PASAT-3 | Atrophy     | 11          | 0.83    | 0.02    | NR              | NR                   |

| Reference       | Disease Course | Cognitive Test                | MRI Measure   | Sample Size | r-value | p-value | Mean ± SD Score | Cognitively Impaired |
|-----------------|----------------|-------------------------------|---------------|-------------|---------|---------|-----------------|----------------------|
| Houtchens 2007  | Mixed          | mean of PASAT-2 and -3        | Atrophy (TVW) | 31          | -0.443  | 0.007   | 35.1 (14)       | NR                   |
|                 |                | mean of PASAT-2 and -3        | Atrophy (BPF) | 31          | 0.59    | <0.0001 | 35.1 (14)       | NR                   |
|                 |                | SDMT                          | Atrophy (TVW) | 31          | -0.44   | 0.007   | 48.2 (19)       | NR                   |
|                 |                | SDMT                          | Atrophy (BPF) | 31          | 0.57    | <0.001  | 48.2 (19)       | NR                   |
| Lazeron 2005    | Mixed          | SDMT                          | Atrophy       | 82          | 0.537   | <0.001  | 45.22 (13.67)   | 67%                  |
| van Buchem 1998 | Mixed          | PASAT                         | Atrophy       | 33          | 0.47    | 0.002   | NR              | 54%                  |
|                 |                | SDMT                          | Atrophy       | 33          | 0.24    | 0.14    | NR              | 54%                  |
| Cortese 2011    | Mixed          | Change in PASAT-3 (1-2 years) | Atrophy       | 51          | NS      |         | NR              | NR                   |
|                 |                | Change in SDMT (1-2 years)    | Atrophy       | 51          | NS      |         | NR              | NR                   |
|                 |                | PASAT-3                       | Atrophy       | 51          | NS      |         | NR              | NR                   |
|                 |                | SDMT                          | Atrophy       | 51          | 0.39    | 0.006   | NR              | NR                   |
| Amato 2010      | RRMS           | mean of PASAT-2 and -3        | Atrophy       | 41          | NS      |         | NR              | 43.9%                |
|                 |                | SDMT                          | Atrophy       | 41          | NS      |         | NR              | 43.9%                |

| Reference   | Disease Course             | Cognitive Test | MRI Measure   | Sample Size   | r-value | p-value | Mean ± SD Score | Cognitively Impaired |    |
|-------------|----------------------------|----------------|---------------|---------------|---------|---------|-----------------|----------------------|----|
| Bonnet 2006 | RRMS, low education group  | PASAT-2        | Atrophy (BPF) | 19            | <0.30   | NR      | 25.1 (16.26)    | NR                   |    |
|             |                            | PASAT-2        | Atrophy (VF)  | 19            | <0.30   | NR      | 25.1 (16.26)    | NR                   |    |
|             | RRMS, high education group | PASAT-2        | Atrophy (BPF) | 24            | <0.30   | NR      | 37.62 (8.98)    | NR                   |    |
|             |                            | PASAT-2        | Atrophy (VF)  | 24            | <0.30   | NR      | 37.62 (8.98)    | NR                   |    |
|             | RRMS, low education group  | PASAT-3        | Atrophy (BPF) | 19            | <0.30   | NR      | 36.31 (16.46)   | NR                   |    |
|             |                            | PASAT-3        | Atrophy (VF)  | 19            | <0.30   | NR      | 36.31 (16.46)   | NR                   |    |
|             | RRMS, high education group | PASAT-3        | Atrophy (VF)  | 24            | <0.30   | NR      | 47.41 (8.63)    | NR                   |    |
|             |                            | PASAT-3        | Atrophy (BPF) | 24            | >0.40   | <0.05   | 47.41 (8.63)    | NR                   |    |
|             | RRMS, low education group  | SDMT           | Atrophy (VF)  | 19            | <0.30   | NR      | 36.31 (8.49)    | NR                   |    |
|             |                            | SDMT           | Atrophy (BPF) | 19            | <0.30   | NR      | 36.31 (8.49)    | NR                   |    |
|             | RRMS, high education group | SDMT           | Atrophy (VF)  | 24            | <0.30   | NR      | 46.33 (11.46)   | NR                   |    |
|             |                            | SDMT           | Atrophy (BPF) | 24            | >0.40   | <0.05   | 46.33 (11.46)   | NR                   |    |
|             | Brochet 2008               | RRMS           | PASAT         | Atrophy (BPF) | 46      | NS      |                 | NR                   | NR |
|             |                            |                | PASAT         | Atrophy (VF)  | 46      | NS      |                 | NR                   | NR |
| PASAT       |                            |                | Atrophy(BPF)  | 46            | NS      |         | NR              | NR                   |    |
| PASAT       |                            |                | Atrophy (VF)  | 46            | NS      |         | NR              | NR                   |    |
| PASAT       |                            |                | Atrophy (BPF) | 46            | NS      |         | NR              | NR                   |    |
| PASAT       |                            |                | Atrophy (VF)  | 46            | NS      |         | NR              | NR                   |    |
| SDMT        |                            |                | Atrophy (BPF) | 46            | NS      |         | NR              | NR                   |    |

| Reference | Disease Course | Cognitive Test | MRI Measure   | Sample Size | r-value | p-value | Mean $\pm$ SD Score | Cognitively Impaired |
|-----------|----------------|----------------|---------------|-------------|---------|---------|---------------------|----------------------|
|           |                | SDMT           | Atrophy (VF)  | 46          | NS      |         | NR                  | NR                   |
|           |                | SDMT           | Atrophy (VF)  | 46          | NS      | NR      | NR                  | NR                   |
|           |                | SDMT           | Atrophy (BPF) | 46          | NS      |         | NR                  | NR                   |
|           |                | SDMT           | Atrophy (VF)  | 46          | NS      |         | NR                  | NR                   |
|           |                | SDMT           | Atrophy (BPF) | 46          | 0.5     | <0.001  | z score             | NR                   |
|           |                | PASAT-2        | Atrophy(BPF)  | 58          | NR      | NR      | 32.70 (13.35)       | 45%                  |
|           |                | PASAT-2        | Atrophy (VF)  | 58          | NR      | NR      | 32.70 (13.35)       | 45%                  |
|           |                | PASAT-3        | Atrophy (BPF) | 58          | NR      | NR      | 42.43 (13.57)       | 45%                  |
|           |                | PASAT-3        | Atrophy (VF)  | 58          | NR      | NR      | 42.43 (13.57)       | 45%                  |
|           |                | SDMT           | Atrophy (BPF) | 58          | NR      | NR      | 41.19 (12.49)       | 45%                  |
|           |                | SDMT           | Atrophy (VF)  | 58          | NR      | NR      | 41.19 (12.49)       | 45%                  |
|           |                | PASAT-2        | Atrophy       | 41          | NS      |         | NR                  | 56%                  |
|           |                | PASAT-3        | Atrophy       | 41          | NS      |         | NR                  | 56%                  |
|           |                | SDMT           | Atrophy       | 41          | NS      |         | NR                  | 56%                  |
|           |                | PASAT-2        | Atrophy       | 50          | NR      | NR      | NR                  | 33%                  |
|           |                | PASAT-3        | Atrophy       | 50          | NR      | NR      | NR                  | 33%                  |
|           |                | SDMT           | Atrophy       | 50          | NR      | NR      | NR                  | 33%                  |

\*Mild cognitive impairment

BPF = Brain parenchymal fraction; CPMS = Chronic progressive multiple sclerosis; MS = Multiple sclerosis; NBV = Normalized brain volume; NR = Not reported; NS = Non-significant; PASAT = Paced auditory serial addition test; PPMS = Primary progressive multiple sclerosis; RRMS = Relapse-remitting multiple sclerosis; SD = Standard deviation;

SDMT = Symbol Digit Modalities Test; SPMS = Secondary progressive multiple sclerosis ; T2LV = T2-weighted lesion volume; TVW = Third ventricular width; VF = Ventricular fraction
